# Supplementary material
Source: PubMed Central journal article supplement (PMC3275779)
Supplement: NIHMS337215-supplement-04.pdf [file NIHMS337215-supplement-04.pdf]

## Supplemental Table 4

### Significantly changed transcripts at Day 2 of Feeding

\* raw p-values not adjusted for multiple comparisons, overall False Discovery Rate was 0.05

| Contig | Annotation                                        | Fold Change   | p value*      | Fold Change     | p value*        |
|--------|---------------------------------------------------|---------------|---------------|-----------------|-----------------|
|        |                                                   | Day 2 v Unfed | Day 2 v Unfed | Day 2 v Day 1&3 | Day 2 v Day 1&3 |
| 1008   | cuticle, possible                                 | 3.982337      | 0.0000482     | 2.088593        | 0.0013931       |
| 1040   | Thr rich protein                                  | 3.690515      | 0.0000845     | 2.177462        | 0.0010953       |
| 1082   | putative secreted salivary gland peptide          | 6.869421      | 0.0000006     | 2.906677        | 0.0001162       |
| 1245   | putative secreted salivary gland peptide          | 7.397625      | 0.0000012     | 2.810606        | 0.0004552       |
| 1374   | possible Gamma-butyrobetaine                      | -1.72451      | 0.0002288     | -1.53952        | 0.0001860       |
| 1453   | GYG peptide                                       | 5.158856      | 0.0000002     | 2.392757        | 0.0000258       |
| 1572   | cuticle, possible                                 | 5.811767      | 0.0000004     | 1.689022        | 0.0011151       |
| 1597   | Gly-ala-tyr rich                                  | 7.289319      | 0.00000002    | 3.094648        | 0.0000047       |
| 164    | putative 9.4 kDa secreted protein family          | 2.697899      | 0.0009686     | 1.679013        | 0.0065773       |
| 165    | putative 9.4 kDa secreted protein family          | 3.523746      | 0.0000316     | 1.338135        | 0.0063301       |
| 1710   | Sec61 protein translocation complex, beta subunit | 1.50481       | 0.0000119     | 1.006079        | 0.0000778       |
| 1734   | unknown                                           | 3.266721      | 0.0000343     | 1.770714        | 0.0008443       |
| 1759   | cuticle protein                                   | 6.753632      | 0.0000002     | 1.737716        | 0.0010419       |
| 1761   | TIL protease inhibitor                            | 3.870919      | 0.0000025     | 1.598581        | 0.0005134       |
| 1769   | unknown                                           | 6.011314      | 0.0000001     | 2.510484        | 0.0000339       |
| 1845   | collagen alpha 2(IV) chain precursor              | 4.459712      | 0.0000008     | 1.338934        | 0.0014106       |
| 1898   | cuticle protein                                   | 5.732014      | 0.0000008     | 2.214684        | 0.0002900       |
| 2339   | unknown                                           | -1.20758      | 0.0030323     | -1.00044        | 0.0038976       |
| 2459   | chitinase domain                                  | 2.671424      | 0.0000087     | 1.736665        | 0.0000705       |
| 2462   | unknown                                           | 6.581578      | 0.0000001     | 1.450629        | 0.0021438       |
| 2664   | cuticle, possible                                 | 4.984338      | 0.0000016     | 1.548389        | 0.0020404       |
| 2957   | Gly-ala-tyr rich                                  | 6.369946      | 0.0000002     | 3.002497        | 0.0000211       |
| 3001   | homeodomain only protein                          | -1.85509      | 0.0000289     | -1.36791        | 0.0000914       |
| 478    | possible cuticle protein                          | 6.420723      | 0.0000001     | 2.470869        | 0.0000286       |
| 479    | Gly-ala-tyr rich                                  | 4.520776      | 0.0000674     | 1.874249        | 0.0069420       |
| 690    | Gly-ala-tyr rich                                  | 6.067428      | 0.0000003     | 2.319159        | 0.0001488       |
| 776    | Gly-ala-tyr rich                                  | 7.271777      | 0.0000001     | 1.602641        | 0.0018416       |
| 811    | unknown                                           | 1.229241      | 0.0029423     | -1.33961        | 0.0007266       |
