# Supplementary material
Source: PubMed Central journal article supplement (PMC3275779)
Supplement: NIHMS337215-supplement-05.pdf [file NIHMS337215-supplement-05.pdf]

## Supplemental Table 5

### Significantly changed transcripts at Day 3 of Feeding

\* raw p-values not adjusted for multiple comparisons, overall False Discovery Rate was 0.05

| Contig | Annotation                                               | Fold Change<br>Day 3 v Unfed | p value*<br>Day 3 v Unfed | Fold Change<br>Day 3 v Day 1&2 | p value*<br>Day 3 v Day 1&2 |
|--------|----------------------------------------------------------|------------------------------|---------------------------|--------------------------------|-----------------------------|
| 1002   | GYG rich peptide                                         | -1.23788                     | 0.0021126                 | 1.4998                         | 0.0002487                   |
| 1063   | similar to other tick proteins                           | 2.044987                     | 0.0001986                 | 2.355641                       | 0.0000264                   |
| 1068   | unknown                                                  | -1.31428                     | 0.0005463                 | -1.15736                       | 0.0004899                   |
| 1070   | putative serpin                                          | 1.811057                     | 0.0049666                 | 1.591148                       | 0.0045908                   |
| 1081   | unknown                                                  | 1.305024                     | 0.0005583                 | 1.102856                       | 0.0006540                   |
| 1082   | putative secreted salivary gland peptide                 | 6.268342                     | 0.0000012                 | 2.005059                       | 0.0013435                   |
| 1109   | preprodefensin                                           | 4.953668                     | 0.0000001                 | 2.155409                       | 0.0000148                   |
| 1146   | actin-5C - sperm individualization                       | 3.322121                     | 0.00000005                | 1.408943                       | 0.0000116                   |
| 1178   | alpha crystallins                                        | 2.978071                     | 0.0000001                 | 1.458025                       | 0.0000057                   |
| 1245   | putative secreted salivary gland peptide                 | 7.012352                     | 0.0000018                 | 2.232695                       | 0.0019325                   |
| 1282   | unknown                                                  | 3.561716                     | 0.0000004                 | 1.185135                       | 0.0004088                   |
| 1284   | adenosylhomocysteinase                                   | 2.796753                     | 0.0002255                 | 1.756186                       | 0.0017800                   |
| 1299   | unknown                                                  | 2.801641                     | 0.0000057                 | 1.248998                       | 0.0006198                   |
| 1303   | unknown                                                  | 1.967492                     | 0.0000548                 | 1.273823                       | 0.0004079                   |
| 1344   | unknown                                                  | 6.303622                     | 0.0000013                 | 2.938014                       | 0.0001293                   |
| 1359   | glutathione S-transferase Mu 1                           | 5.251235                     | 0.00000003                | 1.842454                       | 0.0000271                   |
| 1362   | cys rich could be truncated secreted                     | 1.916339                     | 0.0001117                 | 1.647475                       | 0.0001176                   |
| 1364   | unknown                                                  | 5.35378                      | 0.0000002                 | 1.566062                       | 0.0006374                   |
| 1416   | uncharacterized conserved protein                        | 2.775962                     | 0.0000424                 | 1.209295                       | 0.0037295                   |
| 1440   | unknown                                                  | 1.289231                     | 0.0002672                 | 1.243621                       | 0.0001276                   |
| 1453   | GYG peptide                                              | 4.838284                     | 0.0000004                 | 1.9119                         | 0.0001278                   |
| 1522   | folate receptor alpha precursor                          | 2.186928                     | 0.0000266                 | 1.264983                       | 0.0004429                   |
| 1532   | unknown                                                  | 5.264655                     | 0.0000002                 | 3.648981                       | 0.0000009                   |
| 1561   | unknown                                                  | 3.453012                     | 0.0000001                 | 1.137818                       | 0.0001962                   |
| 1562   | NADP-dependent isocitrate dehydrogenase                  | 1.545777                     | 0.0024733                 | 1.218796                       | 0.0042199                   |
| 1572   | cuticle, possible                                        | 6.975054                     | 0.0000001                 | 3.433952                       | 0.0000080                   |
| 1597   | gly-ala-tyr rich                                         | 7.692828                     | 0.00000001                | 3.699913                       | 0.0000012                   |
| 1607   | unknown                                                  | 1.735367                     | 0.0000128                 | 1.054013                       | 0.0001626                   |
| 1631   | unknown                                                  | 1.914658                     | 0.0000164                 | 1.886171                       | 0.0000063                   |
| 1650   | mitochondrial oxoglutarate/malate carrier proteins       | 1.190943                     | 0.0049423                 | 1.283727                       | 0.0013900                   |
| 1690   | unknown                                                  | 2.89473                      | 0.0000390                 | 1.323292                       | 0.0026544                   |
| 1700   | prolyl 4-hydroxylase alpha subunit                       | 1.682493                     | 0.0003910                 | 1.128217                       | 0.0019626                   |
| 1735   | phosphoribosylamidoimidazole-succinocarboxamide synthase | 1.410304                     | 0.0010535                 | 1.507575                       | 0.0002677                   |
| 1761   | TIL protease inhibitor                                   | 5.467206                     | 0.0000002                 | 3.993011                       | 0.0000007                   |
| 1764   | unknown                                                  | 1.696652                     | 0.0015490                 | 1.321984                       | 0.0028951                   |
| 1765   | tetraspanin family integral membrane protein             | 2.011619                     | 0.0000118                 | 1.037985                       | 0.0004528                   |
| 1769   | unknown                                                  | 7.141196                     | 0.00000003                | 4.205307                       | 0.0000007                   |
| 1815   | SNARE protein TLG1/Syntaxin 6                            | 1.417294                     | 0.0005320                 | 1.540949                       | 0.0001143                   |
| 1853   | lipocalin like protein                                   | 4.868493                     | 0.0000202                 | 4.095634                       | 0.0000250                   |
| 1869   | unknown                                                  | 2.418907                     | 0.0004069                 | 1.564402                       | 0.0025169                   |
| 1898   | cuticle protein                                          | 5.882963                     | 0.0000006                 | 2.441108                       | 0.0001493                   |
| 1927   | lysosomal membrane glycoprotein 1                        | 2.353475                     | 0.0001302                 | 1.4317                         | 0.0013281                   |
| 1957   | cysteine dioxygenase CDO1                                | 3.20794                      | 0.0001483                 | 1.857398                       | 0.0020058                   |
| 1961   | macrophage migration inhibitory factor                   | 3.892266                     | 0.0000251                 | 1.705144                       | 0.0023885                   |
| 1980   | unknown                                                  | 3.150175                     | 0.0000034                 | 1.02689                        | 0.0028108                   |
| 2002   | NADP-dependent isocitrate dehydrogenase                  | 2.150691                     | 0.0000026                 | 1.038093                       | 0.0001854                   |
| 2025   | unknown                                                  | 2.704271                     | 0.0000079                 | 1.402941                       | 0.0003067                   |
| 2048   | unknown                                                  | 2.265157                     | 0.0000098                 | 1.382848                       | 0.0001223                   |
| 2071   | unknown                                                  | 3.094424                     | 0.0003468                 | 1.766709                       | 0.0044534                   |
| 2138   | basic region leucine zipper transcription factor         | 2.731893                     | 0.0001065                 | 3.25071                        | 0.0000107                   |
| 2199   | unknown                                                  | 2.243136                     | 0.0000148                 | 1.224632                       | 0.0003833                   |
| 2207   | cys rich - maybe truncated form of secreted peptide      | 3.040766                     | 0.0000034                 | 1.983652                       | 0.0000279                   |

## Supplemental Table 5

### Significantly changed transcripts at Day 3 of Feeding

\* raw p-values not adjusted for multiple comparisons, overall False Discovery Rate was 0.05

| Contig | Annotation                                              | Fold Change   | p value*      | Fold Change     | p value*        |
|--------|---------------------------------------------------------|---------------|---------------|-----------------|-----------------|
|        |                                                         | Day 3 v Unfed | Day 3 v Unfed | Day 3 v Day 1&2 | Day 3 v Day 1&2 |
| 2214   | unknown                                                 | 1.428477      | 0.0002956     | 1.11585         | 0.0005840       |
| 2241   | glycine rich                                            | 1.783529      | 0.0038769     | 2.525527        | 0.0001762       |
| 2308   | unknown                                                 | 2.718587      | 0.0000118     | 2.530184        | 0.0000069       |
| 2338   | glycine/serine hydroxymethyltransferase                 | 2.506945      | 0.0000086     | 1.455555        | 0.0001536       |
| 2355   | unknown                                                 | 1.385386      | 0.0000048     | 1.187717        | 0.0000047       |
| 2385   | macrophage migration inhibitory factor                  | 3.048818      | 0.0000001     | 1.240205        | 0.0000420       |
| 2424   | cystatin                                                | 3.676323      | 0.0000003     | 1.790101        | 0.0000251       |
| 2466   | sulfotransferase                                        | 2.32945       | 0.0000554     | 2.170294        | 0.0000327       |
| 2475   | unknown conserved                                       | 1.264532      | 0.0024825     | 1.003058        | 0.0040957       |
| 2479   | unknown                                                 | 3.202273      | 0.0002262     | 2.808452        | 0.0002076       |
| 248    | alkyl hydroperoxide reductase                           | 4.385355      | 0.0000100     | 2.120362        | 0.0006000       |
| 2490   | unknown                                                 | 3.302956      | 0.0000028     | 1.928141        | 0.0000516       |
| 2515   | unknown                                                 | 3.010787      | 0.0000098     | 2.538006        | 0.0000120       |
| 2576   | unknown                                                 | 2.971461      | 0.0006847     | 2.292035        | 0.0014152       |
| 2577   | zonadhesin                                              | 6.375225      | 0.0000001     | 2.050247        | 0.0000297       |
| 2580   | truncated putative secreted salivary gland peptide      | 2.167617      | 0.0007851     | 1.421794        | 0.0041343       |
| 2603   | sulfotransferase                                        | 2.710239      | 0.0001373     | 1.785654        | 0.0008468       |
| 2631   | unknown conserved                                       | 2.690973      | 0.0000033     | 1.594278        | 0.0000545       |
| 2653   | sulfate/bicarbonate/oxalate exchanger SAT               | 1.084029      | 0.0063301     | 1.291201        | 0.0009960       |
| 2664   | cuticle, possible                                       | 5.411382      | 0.0000008     | 2.188954        | 0.0002227       |
| 2667   | unknown                                                 | 3.80666       | 0.0000061     | 1.63895         | 0.0008233       |
| 2720   | procollagen-proline                                     | 1.383652      | 0.0060376     | 1.705948        | 0.0007568       |
| 2744   | unknown                                                 | 1.243304      | 0.0064760     | 1.087493        | 0.0061438       |
| 2754   | unknown                                                 | 1.045627      | 0.0017239     | 1.178911        | 0.0003210       |
| 2765   | ribonuclease, T2 family                                 | 2.420915      | 0.0000181     | 1.55146         | 0.0001557       |
| 2783   | glutathione S-transferase                               | 2.183695      | 0.0000113     | 1.339747        | 0.0001350       |
| 2802   | unknown                                                 | 4.268906      | 0.0000266     | 1.595456        | 0.0060613       |
| 2839   | FKBP-type peptidyl-prolyl cis-trans isomerase           | 2.281959      | 0.0000049     | 1.20476         | 0.0001762       |
| 2850   | actin-5C - sperm individualization                      | 3.960302      | 0.0000007     | 1.197012        | 0.0013340       |
| 2870   | unknown                                                 | 1.1303        | 0.0012562     | 1.229731        | 0.0002878       |
| 2907   | Sulfotransferase                                        | 1.618027      | 0.0045371     | 1.86934         | 0.0008180       |
| 2940   | serpin                                                  | 4.353355      | 0.0000776     | 2.632279        | 0.0008705       |
| 2957   | Gly-ala-tyr rich                                        | 6.414716      | 0.0000002     | 3.069652        | 0.0000179       |
| 2974   | sterol O-acyltransferase 2                              | 1.861134      | 0.0045622     | 1.832674        | 0.0021930       |
| 2997   | unknown                                                 | 3.550121      | 0.0000024     | 1.679311        | 0.0001997       |
| 3017   | ornithine decarboxylase antizyme                        | 1.555438      | 0.0001233     | 1.178934        | 0.0003069       |
| 3024   | unknown                                                 | 2.427633      | 0.0000269     | 1.175617        | 0.0013834       |
| 420    | peritrophin                                             | 2.936417      | 0.0000034     | 2.346491        | 0.0000062       |
| 469    | putative secreted protease inhibitor                    | 4.085895      | 0.0000288     | 3.126128        | 0.0000702       |
| 470    | putative secreted protease inhibitor                    | 5.492296      | 0.0000004     | 3.532873        | 0.0000040       |
| 476    | unknown                                                 | 3.110036      | 0.0000011     | 1.078021        | 0.0007554       |
| 478    | possible cuticle protein                                | 7.379974      | 0.0000002     | 3.909745        | 0.0000009       |
| 479    | Gly-ala-tyr rich                                        | 5.204162      | 0.0000244     | 2.899328        | 0.0005253       |
| 480    | cuticle?                                                | 4.78326       | 0.0000160     | 2.897808        | 0.0002038       |
| 502    | DNA-binding nuclear protein p8                          | 4.11674       | 0.0000008     | 2.542891        | 0.0000107       |
| 513    | GGY Neuropeptide-Like Protein                           | 2.177832      | 0.0000103     | 2.062481        | 0.0000053       |
| 575    | mucin/peritrophin-like protein precursor                | 6.007054      | 0.0000003     | 1.732197        | 0.0008595       |
| 577    | B-cell receptor-associated protein and related proteins | 1.574172      | 0.0015716     | 1.268574        | 0.0024140       |
| 580    | Cu2+/Zn2+ superoxide dismutase SOD1                     | 2.544627      | 0.0000025     | 1.644172        | 0.0000220       |
| 661    | tetraspanin family integral membrane protein            | 2.247946      | 0.0000552     | 1.776935        | 0.0001054       |

## Supplemental Table 5

### Significantly changed transcripts at Day 3 of Feeding

\* raw p-values not adjusted for multiple comparisons, overall False Discovery Rate was 0.05

| Contig | Annotation                         | Fold Change   | p value*      | Fold Change     | p value*        |
|--------|------------------------------------|---------------|---------------|-----------------|-----------------|
|        |                                    | Day 3 v Unfed | Day 3 v Unfed | Day 3 v Day 1&2 | Day 3 v Day 1&2 |
| 664    | actin-5C - sperm individualization | 2.629956      | 0.0000002     | 1.255373        | 0.0000148       |
| 688    | TIL protease inhibitor             | 2.191892      | 0.0067538     | 2.032136        | 0.0046847       |
| 690    | Gly-ala-tyr rich                   | 6.471417      | 0.0000002     | 2.925143        | 0.0000286       |
| 719    | nucleolin; protein C23             | -2.47229      | 0.0000009     | -1.79953        | 0.0000034       |
| 740    | unknown                            | 1.690882      | 0.0000100     | 1.571368        | 0.0000059       |
| 763    | low complexity protein             | 4.684648      | 0.0000217     | 1.714627        | 0.0058455       |
| 776    | Gly-ala-tyr rich                   | 5.370094      | 0.0000010     | -1.24988        | 0.0074117       |
| 807    | alkyl hydroperoxide reductase      | 4.687832      | 0.0000001     | 1.362221        | 0.0003711       |
| 861    | unknown                            | 2.381331      | 0.0000507     | 2.04134         | 0.0000546       |
| 876    | mucin                              | 3.668998      | 0.0000086     | 2.136502        | 0.0001509       |
| 877    | enoyl-CoA hydratase                | 2.403887      | 0.0000633     | 1.025801        | 0.0056853       |
| 902    | fructose-biphosphate aldolase      | 2.531766      | 0.0000014     | 1.503732        | 0.0000242       |
| 903    | glutathione S-transferase Mu 1     | 3.851856      | 0.00000003    | 1.027692        | 0.0001916       |
| 933    | unknown                            | 2.239015      | 0.0000506     | 1.355377        | 0.0005889       |
| 974    | mitochondrial chaperonin           | 2.83367       | 0.0000001     | -1.2376         | 0.0000195       |
